# Supplementary material for: Alterations of Lysine Acetylation Profile in Murine Skeletal Muscles Upon Exercise
Source: PubMed Central journal article supplement (PMC9110802; doi:10.3389/fnagi.2022.859313), 2022-05-03

| Raw file    | Scan number | Mass analyzer | Score  | m/z      | Proteins |
|-------------|-------------|---------------|--------|----------|----------|
| F8184TPAc_1 | 8854        | FTMS          | 103.88 | 616.8066 | P07310   |

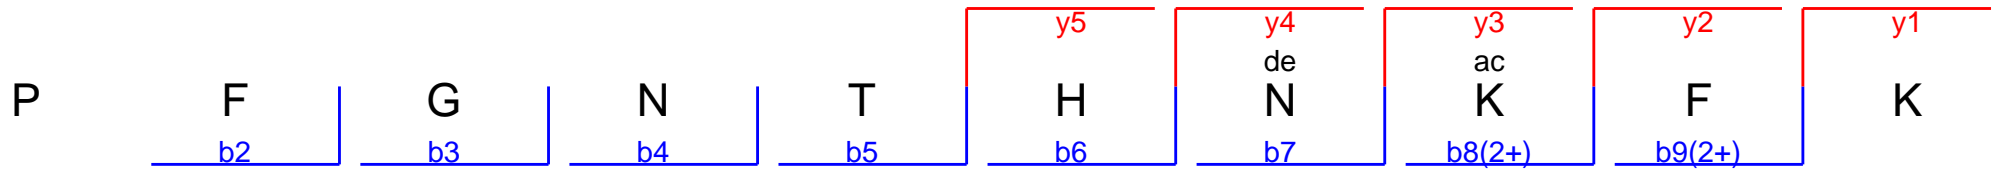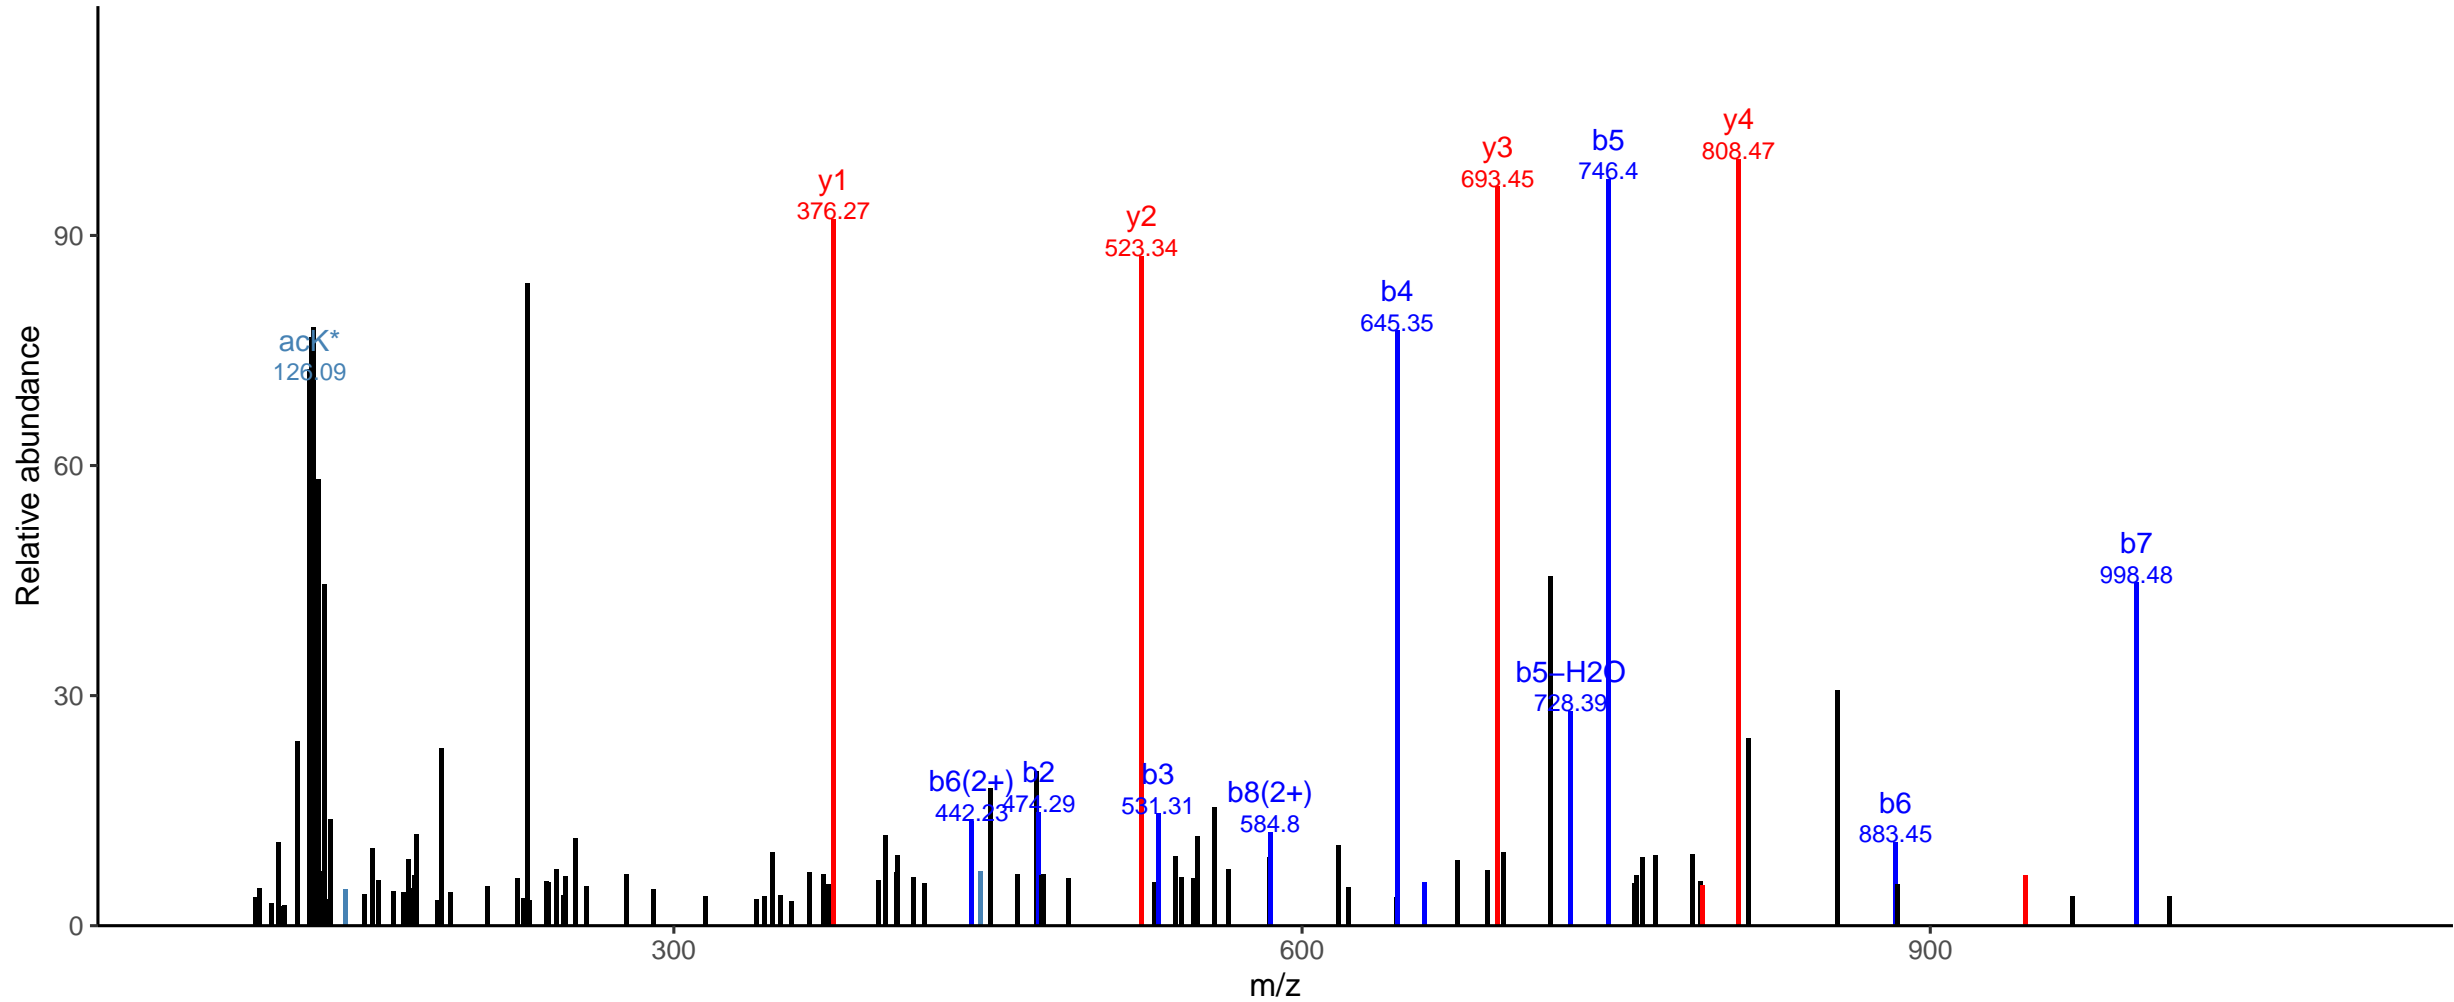

Supplement: Image_1.pdf [file Image_1.pdf]
