# Supplementary material for: Alterations of Lysine Acetylation Profile in Murine Skeletal Muscles Upon Exercise
Source: PubMed Central journal article supplement (PMC9110802; doi:10.3389/fnagi.2022.859313), 2022-05-03

| Raw file    | Scan number | Mass analyzer | Score  | m/z      | Proteins             |
|-------------|-------------|---------------|--------|----------|----------------------|
| F8184TPAc_4 | 7432        | FTMS          | 142.38 | 710.8531 | P13542;Q5SX39;Q5SX40 |

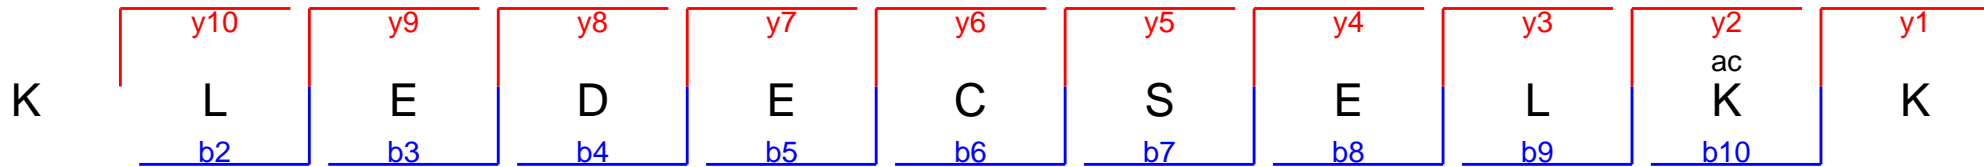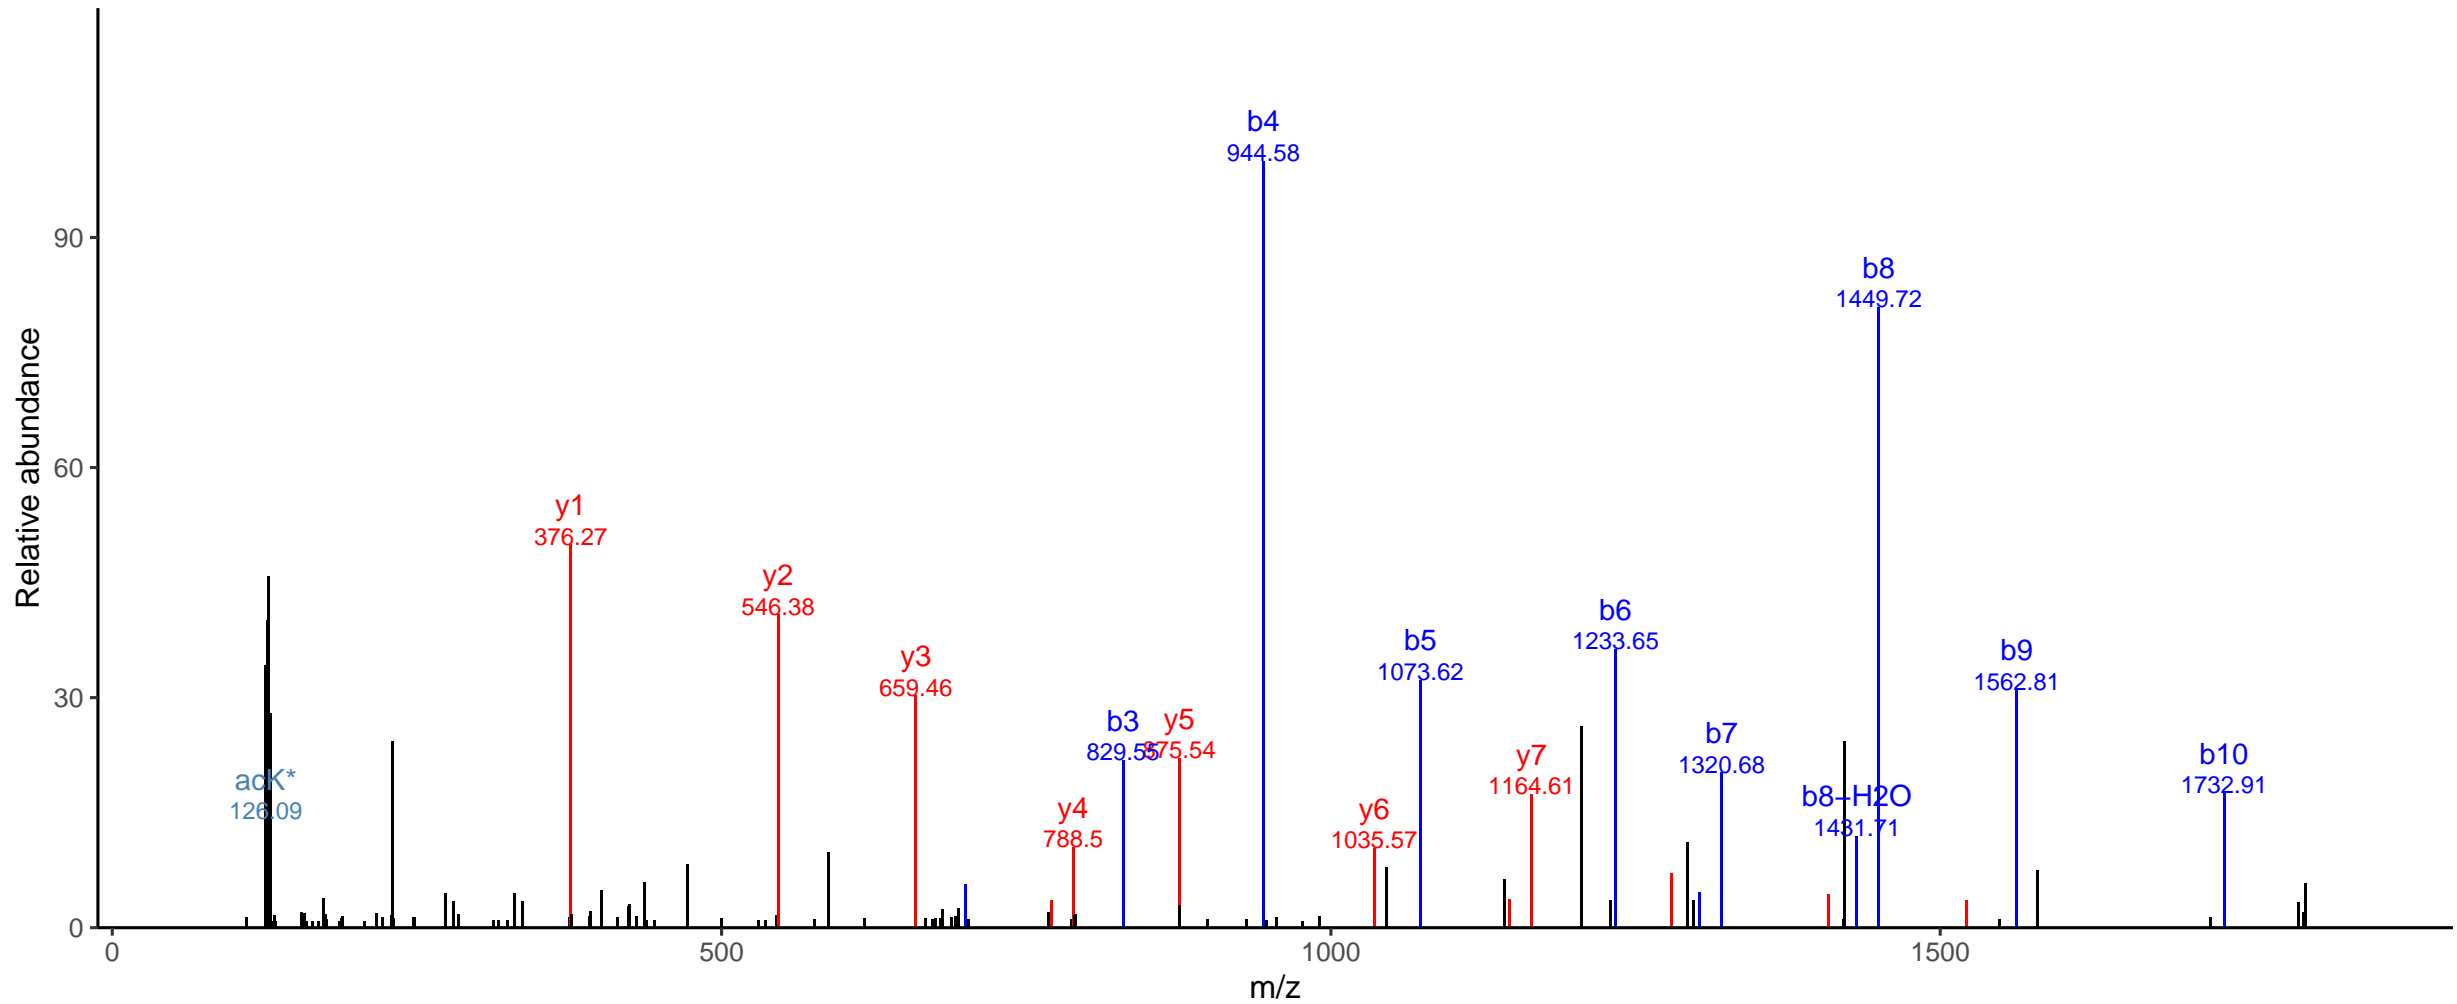

Supplement: Image_2.pdf [file Image_2.pdf]
